# Supplementary material for: Synthesis of four derivatives of 3,6,10-tri(carboxymethyl)-3,6,10-triazadodecanedioic acid, the stabilities of their complexes with Ca(ii), Cu(ii), Zn(ii) and lanthanide(iii) and water-exchange investigations of Gd(iii) chelatesElectronic supplementary information (ESI) available: tables of pM values and relaxivities; potentiometric titration curves for TTDA-PY, TTDA-HP, TTDA-H1P and TTDA-H2P; species distribution curves, plots of temperature dependence of transverse electronic relaxation rates and plots of pH dependence of conditional stability constants for Gd complexes of all four ligands and TTDA; 1H NMR and COSY spectra of [La(TTDA-HP)]â€“. See http://www.rsc.org/suppdata/dt/b1/b107456n/
Source: Royal Society of Chemistry journal article supplement (doi:10.1039/b107456n), 2001-10-26
Supplement: b107456n-1.doc [file b107456n-1.doc]

**Table 1S** The pM values for the Gd(III), Zn(II), Ca(II) and Cu(II) complexes of TTDA-PY, TTDA-HP, TTDA-H1P, TTDA-H2P, TTDA and DTPA at pH 7.4

TTDA-PY TTDA-HP TTDA-H1P TTDA-H2P DTPAb TTDAc

pGd 17.65 11.39 11.52 11.76 17.14 17.03

pCu 14.61 12.03 12.76 12.48 16.06 13.56

pCa 6.86 6.67 8.53 7.71 5.45 9.73

pZn 11.32 9.17 12.22 11.79 13.39 13.22

a pM = log [M]free at pH = 7.4, [metal ion]total = 1mol dm-3 and [ligand]total = 1.1 mol dm-3.

b Data were obtained from ref. 16,34,36. cref. 25.

**Table 2S** Relaxivities *r*1 of [Gd(TTDA-PY)(H2O)], [Gd(TTDA-HP)(H2O)2], [Gd(TTDA-H1P)(H2O)2], [Gd(TTDA-H2P)(H2O)2], [Gd(TTDA)(H2O)]2 and [Gd(DTPA)(H2O)]2 at 37.0  0.1 C and 20 MHz

pH *r*1 relaxivity

Complex /dm3 mmol-1 s-1

[Gd(TTDA-PY)(H2O)] 6.7  0.1 3.90  0.03

[Gd(TTDA-HP)(H2O)2] 6.7  0.1 5.53  0.04

[Gd(TTDA-H1P)(H2O)2] 6.7  0.1 5.28  0.03

[Gd(TTDA-H2P)(H2O)2] 6.7  0.1 4.94  0.04

a[Gd(TTDA)(H2O)]2 7.5  0.1 3.85  0.03

b[Gd(DTPA)(H2O)]2 7.6  0.1 3.89  0.03

a Data were obtained from ref. 25. bref. 16.
