# Supplementary material for: Synthesis of four derivatives of 3,6,10-tri(carboxymethyl)-3,6,10-triazadodecanedioic acid, the stabilities of their complexes with Ca(ii), Cu(ii), Zn(ii) and lanthanide(iii) and water-exchange investigations of Gd(iii) chelatesElectronic supplementary information (ESI) available: tables of pM values and relaxivities; potentiometric titration curves for TTDA-PY, TTDA-HP, TTDA-H1P and TTDA-H2P; species distribution curves, plots of temperature dependence of transverse electronic relaxation rates and plots of pH dependence of conditional stability constants for Gd complexes of all four ligands and TTDA; 1H NMR and COSY spectra of [La(TTDA-HP)]â€“. See http://www.rsc.org/suppdata/dt/b1/b107456n/
Source: Royal Society of Chemistry journal article supplement (doi:10.1039/b107456n), 2001-10-26
Supplement: b107456n-2.doc [file b107456n-2.doc]

Zn2+

pH

L

Ca2+

Cu2+

a

**Fig. 1S** Titration curves for 1:1 ratios of metal ion to TTDA-PY  = 0.1 mol dm-3 Me4NNO3; T = 25.0  0.1 C; concentrations of ligand and metal ions = 1.0  10-3 mol dm-3

Ca2+

pH

Zn2+

Cu2+

L

a

**Fig. 2S** Titration curves for 1:1 ratios of metal ion to TTDA-HP  = 0.1 mol dm-3 Me4NNO3; T = 25.0  0.1 C; concentrations of ligand and metal ions = 1.0  10-3 mol dm-3

Ca2+

L

pH

Zn2+

Cu2+

a

**Fig. 3S** Titration curves for 1:1 ratios of metal ion to TTDA-H1P = 0.1 mol dm-3 Me4NNO3 ; T = 25.0  0.1 C; concentrations of ligand and metal ions = 1.0  10-3 mol dm-3.

pH

Ca2+

L

Zn2+

Cu2+

a

**Fig. 4S** Titration curves for 1:1 ratios of metal ion to TTDA-H2P = 0.1 mol dm-3 Me4NNO3; T = 25.0 0.1 C; concentrations of ligand and metal ions = 1.0  10-3 mol dm-3.
