# Supplementary material for: Synthesis of four derivatives of 3,6,10-tri(carboxymethyl)-3,6,10-triazadodecanedioic acid, the stabilities of their complexes with Ca(ii), Cu(ii), Zn(ii) and lanthanide(iii) and water-exchange investigations of Gd(iii) chelatesElectronic supplementary information (ESI) available: tables of pM values and relaxivities; potentiometric titration curves for TTDA-PY, TTDA-HP, TTDA-H1P and TTDA-H2P; species distribution curves, plots of temperature dependence of transverse electronic relaxation rates and plots of pH dependence of conditional stability constants for Gd complexes of all four ligands and TTDA; 1H NMR and COSY spectra of [La(TTDA-HP)]â€“. See http://www.rsc.org/suppdata/dt/b1/b107456n/
Source: Royal Society of Chemistry journal article supplement (doi:10.1039/b107456n), 2001-10-26
Supplement: b107456n-4.doc [file b107456n-4.doc]

Log *K*con

pH

**Fig. 7S** pH Dependence of conditional stability constants for [Gd(TTDA-PY)](●), [Gd(TTDA)]2(□), [Gd(TTDA-HP)](○), [Gd(TTDA-H1P)](■) and [Gd(TTDA-H2P)](∆)


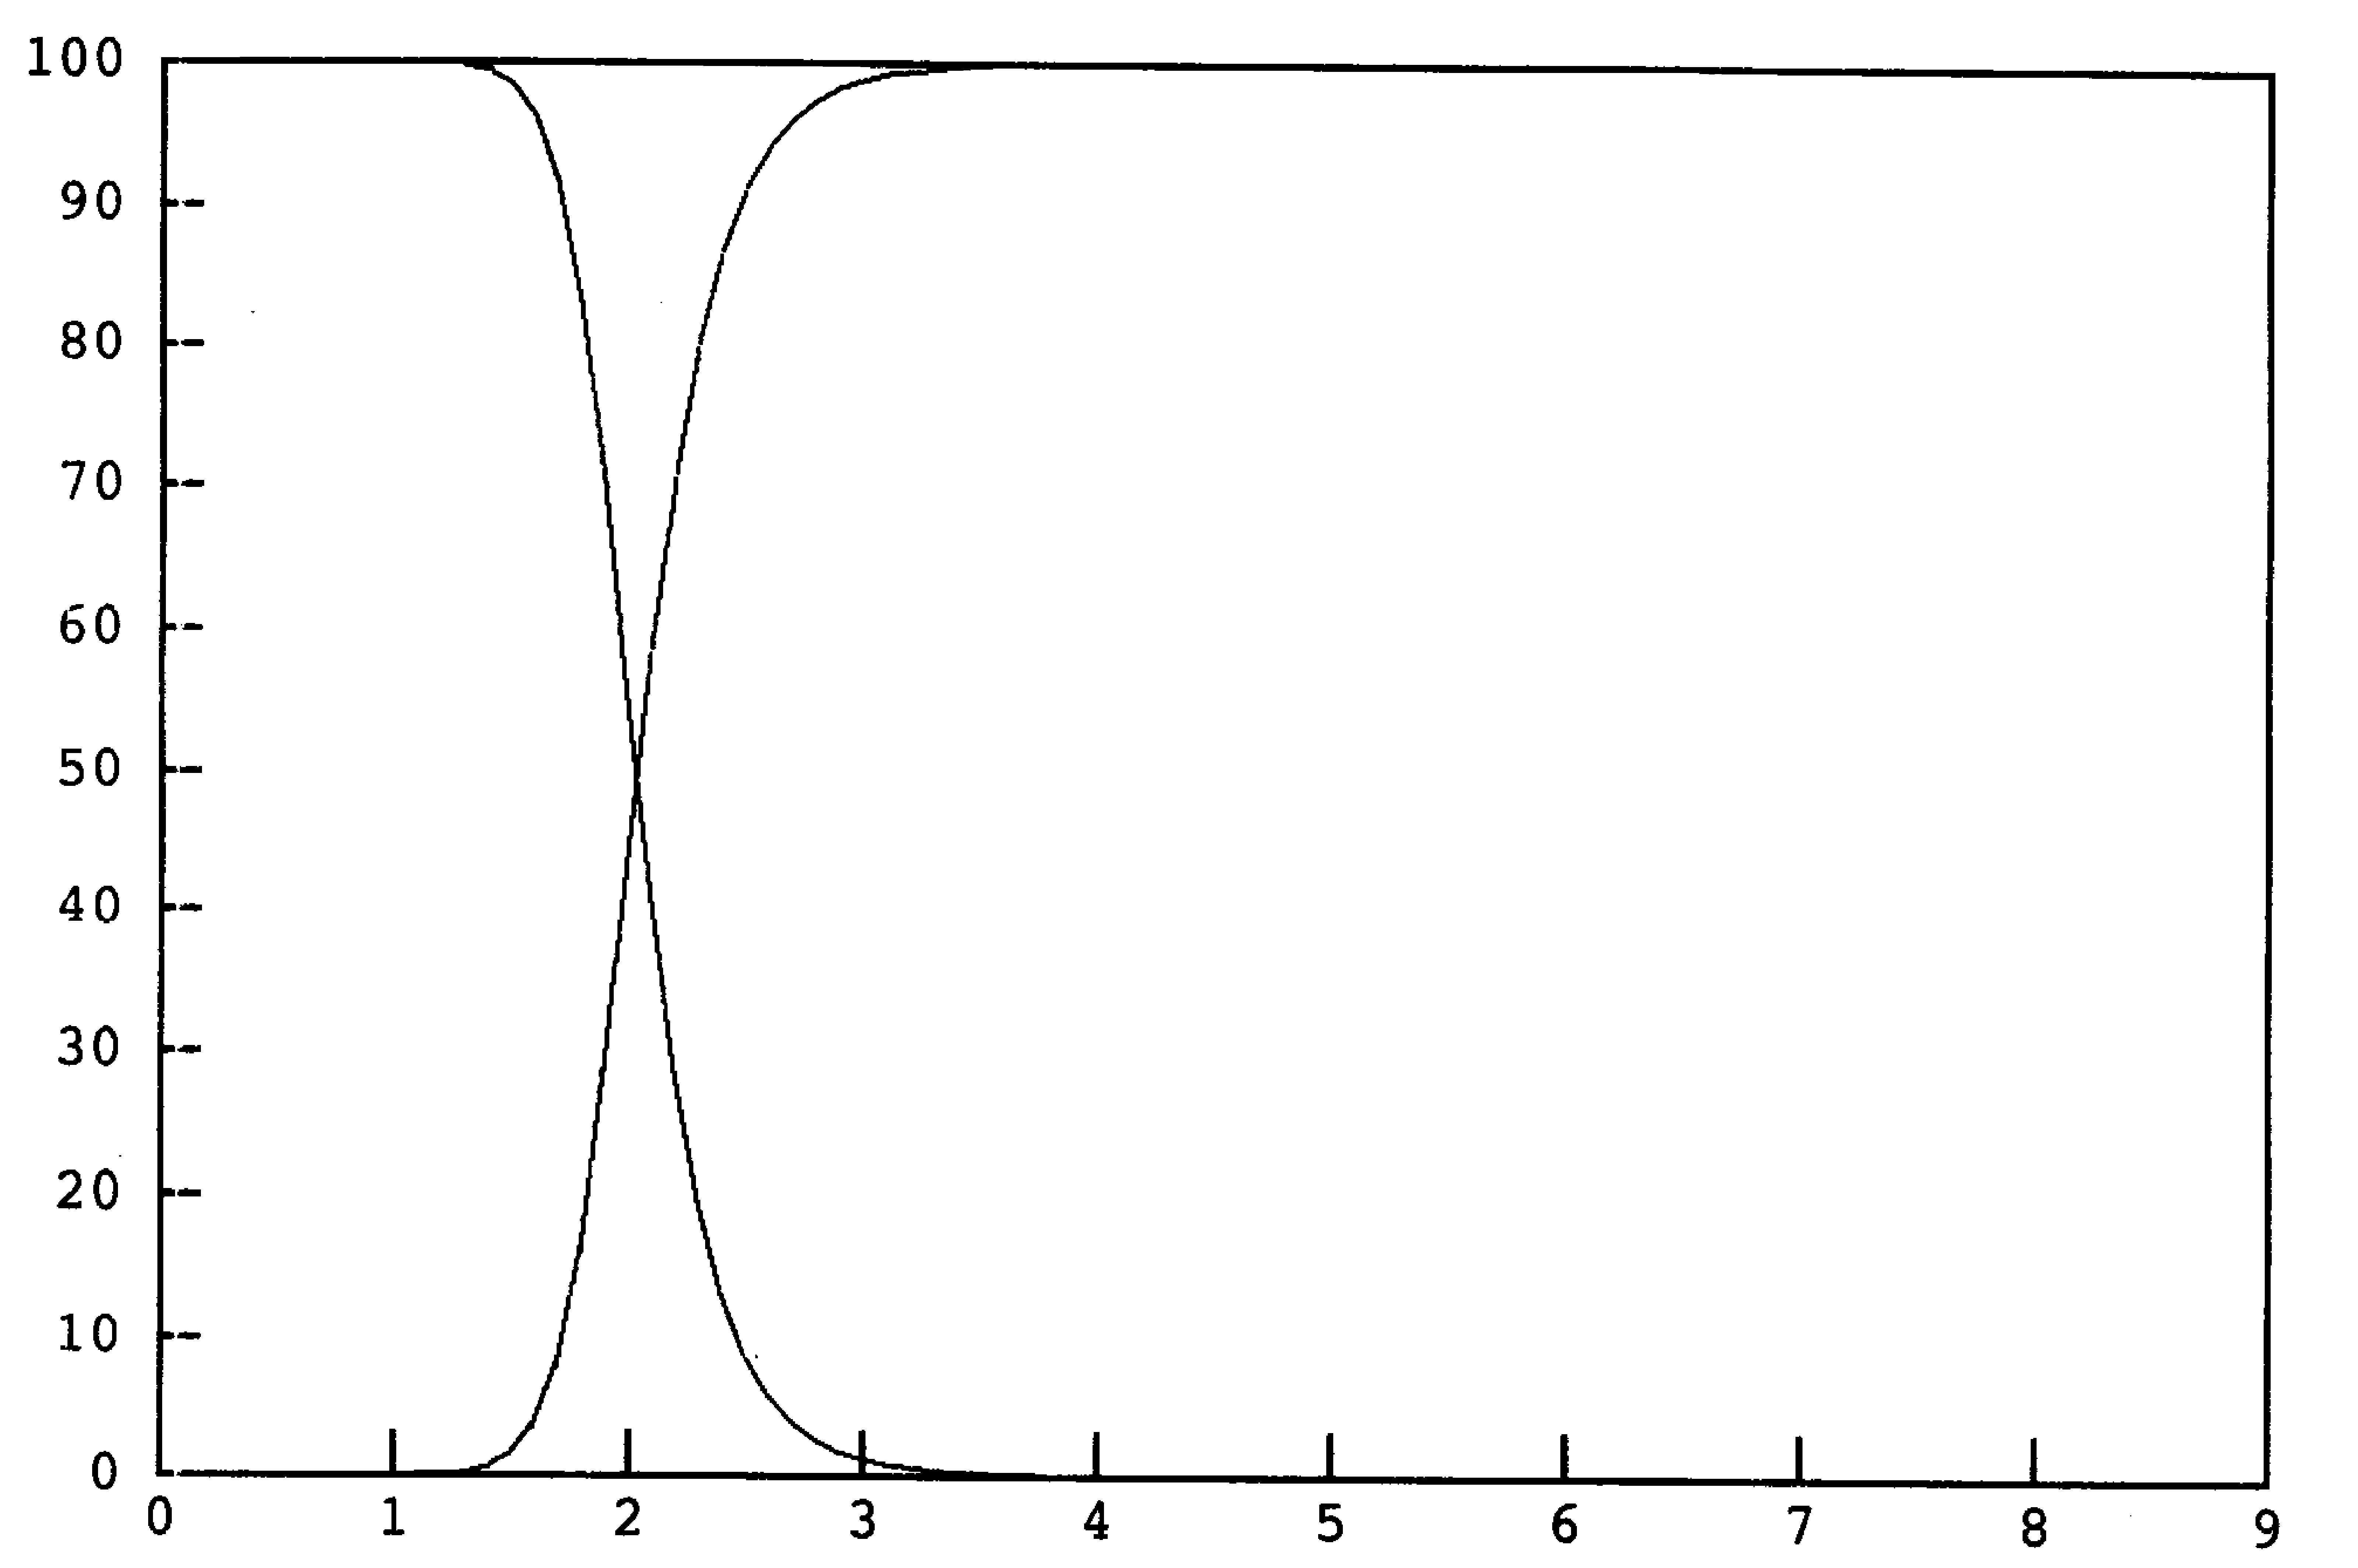


[Gd3+]

[Gd(TTDA-PY)]

%

pH

**Fig. 8S** Species distribution curves for 1.0  10-3 mol dm-3 [Gd(TTDA_PY)] system containing a 1:1 molar ratio of Gd(III) to ligand. T = 25.0  0.1 C; = 0.10 mol dm-3 Me4NNO3 ;  = percent relative to 1.0  10-3 mol dm-3 total TTDA-PY species = 100 


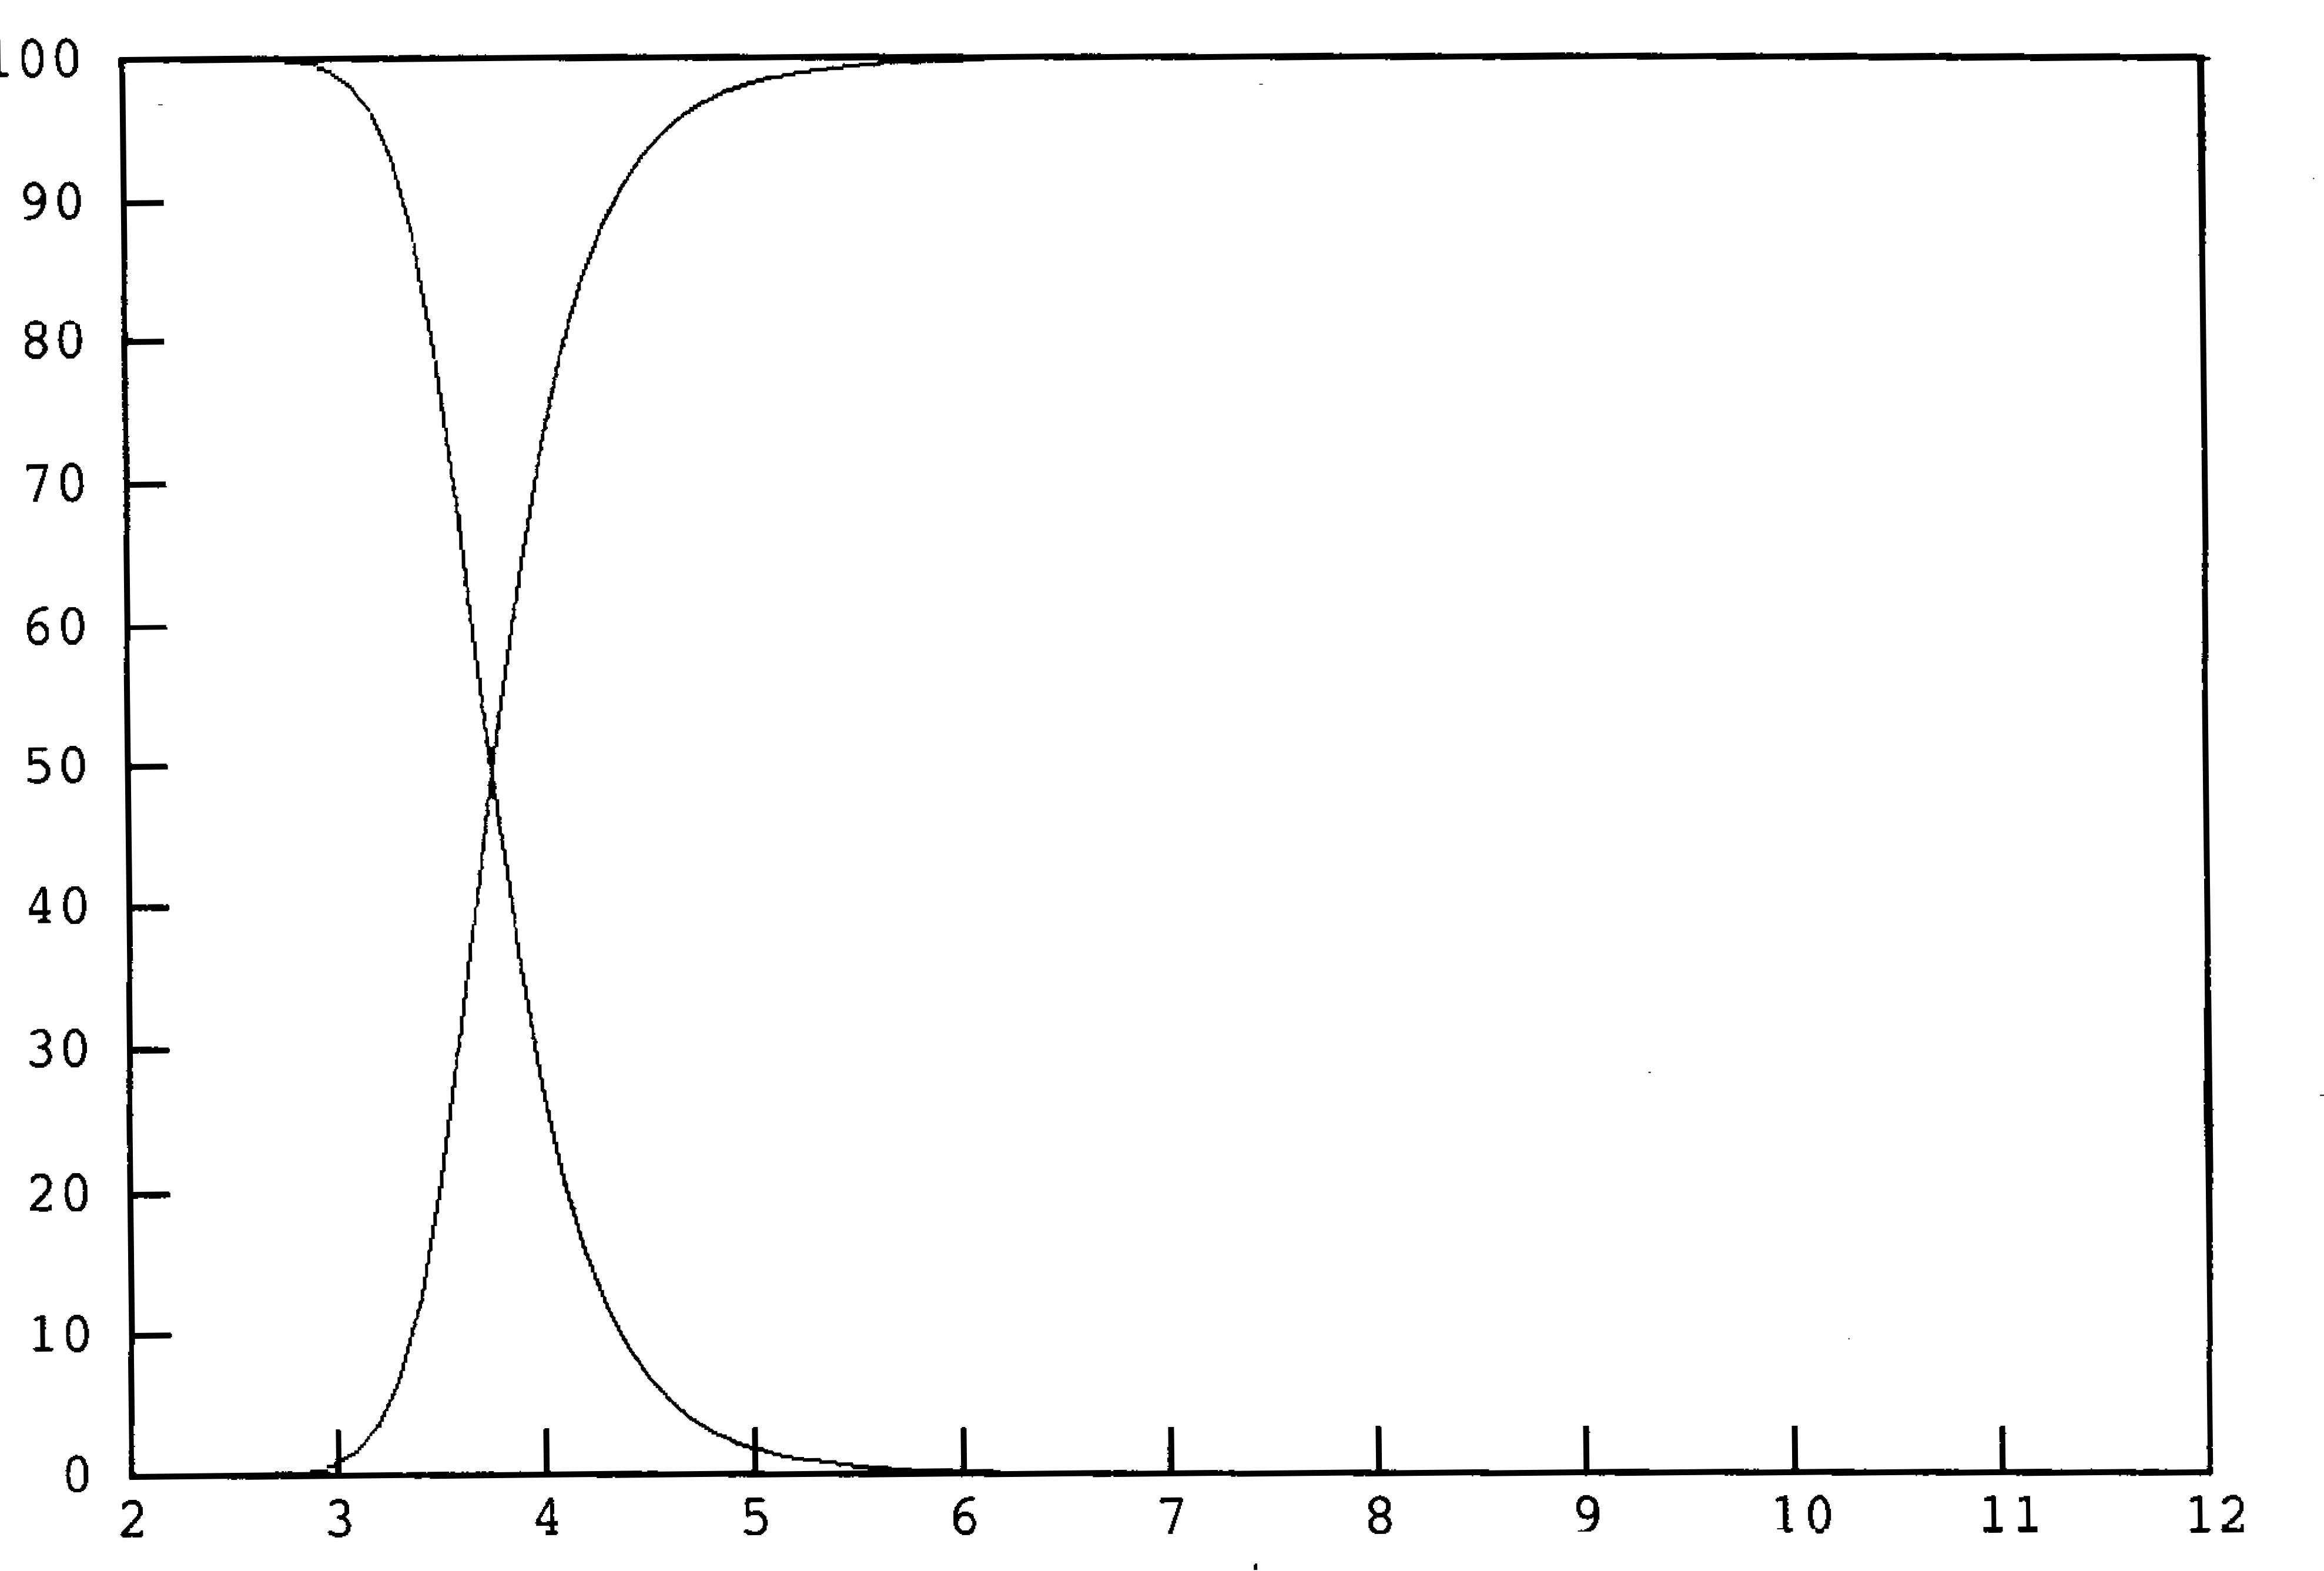


Gd3+

[Gd(TTDA-HP)]



pH

**Fig. 9S** Species distribution curves for 1.0 10-3 mol dm-3 [Gd(TTDA-HP)] system containing a 1:1 molar ratio of Gd(III) to ligand. T = 25.0  0.1 C; = 0.10 mol dm-3 Me4NNO3 ;  = percent relative to 1.0  10-3 mol dm-3 total TTDA-HP species = 100 


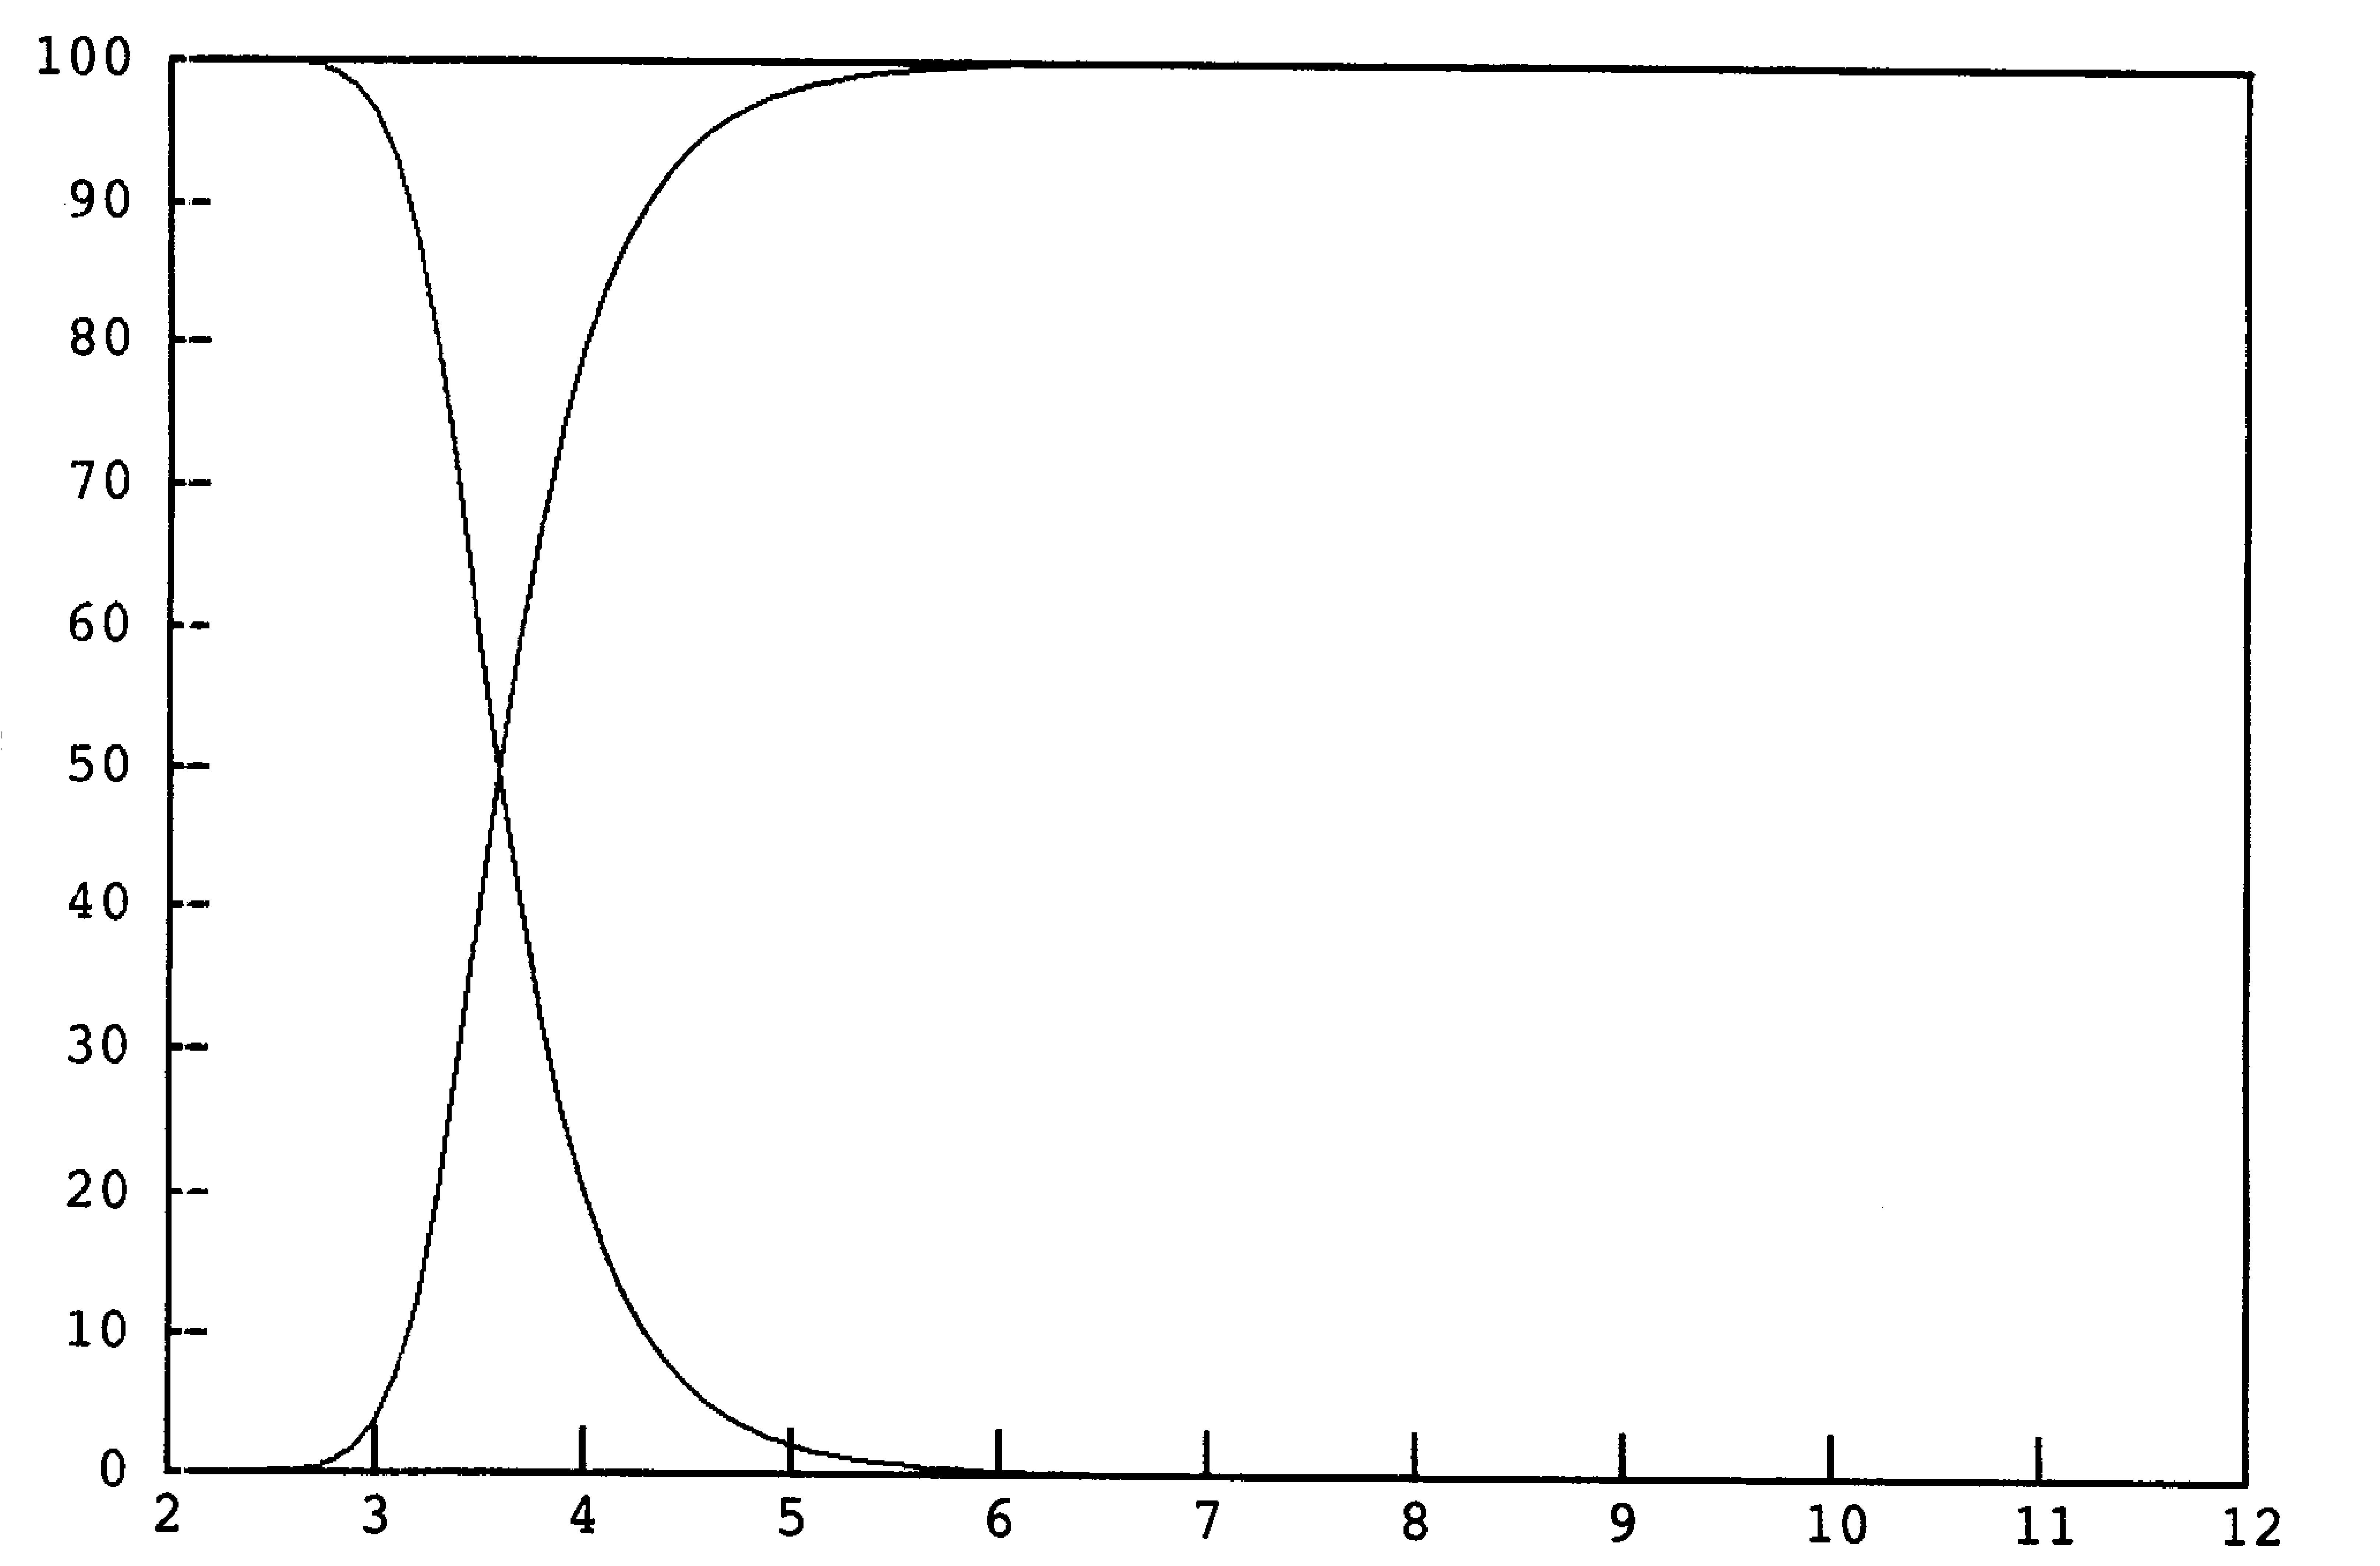


[Gd3+]

[Gd(TTDA-H1P)]

%

pH

**Fig. 10S** Species distribution curves for 1.010-3 mol dm-3 [Gd(TTDA-H1P)] system containing a 1:1 molar ratio of Gd(III) to ligand. T = 25.0  0.1 C; μ= 0.10 mol dm-3 Me4NNO3 ;  = percent relative to 1.0  10-3 mol dm-3 total TTDA-H1P species = 100 


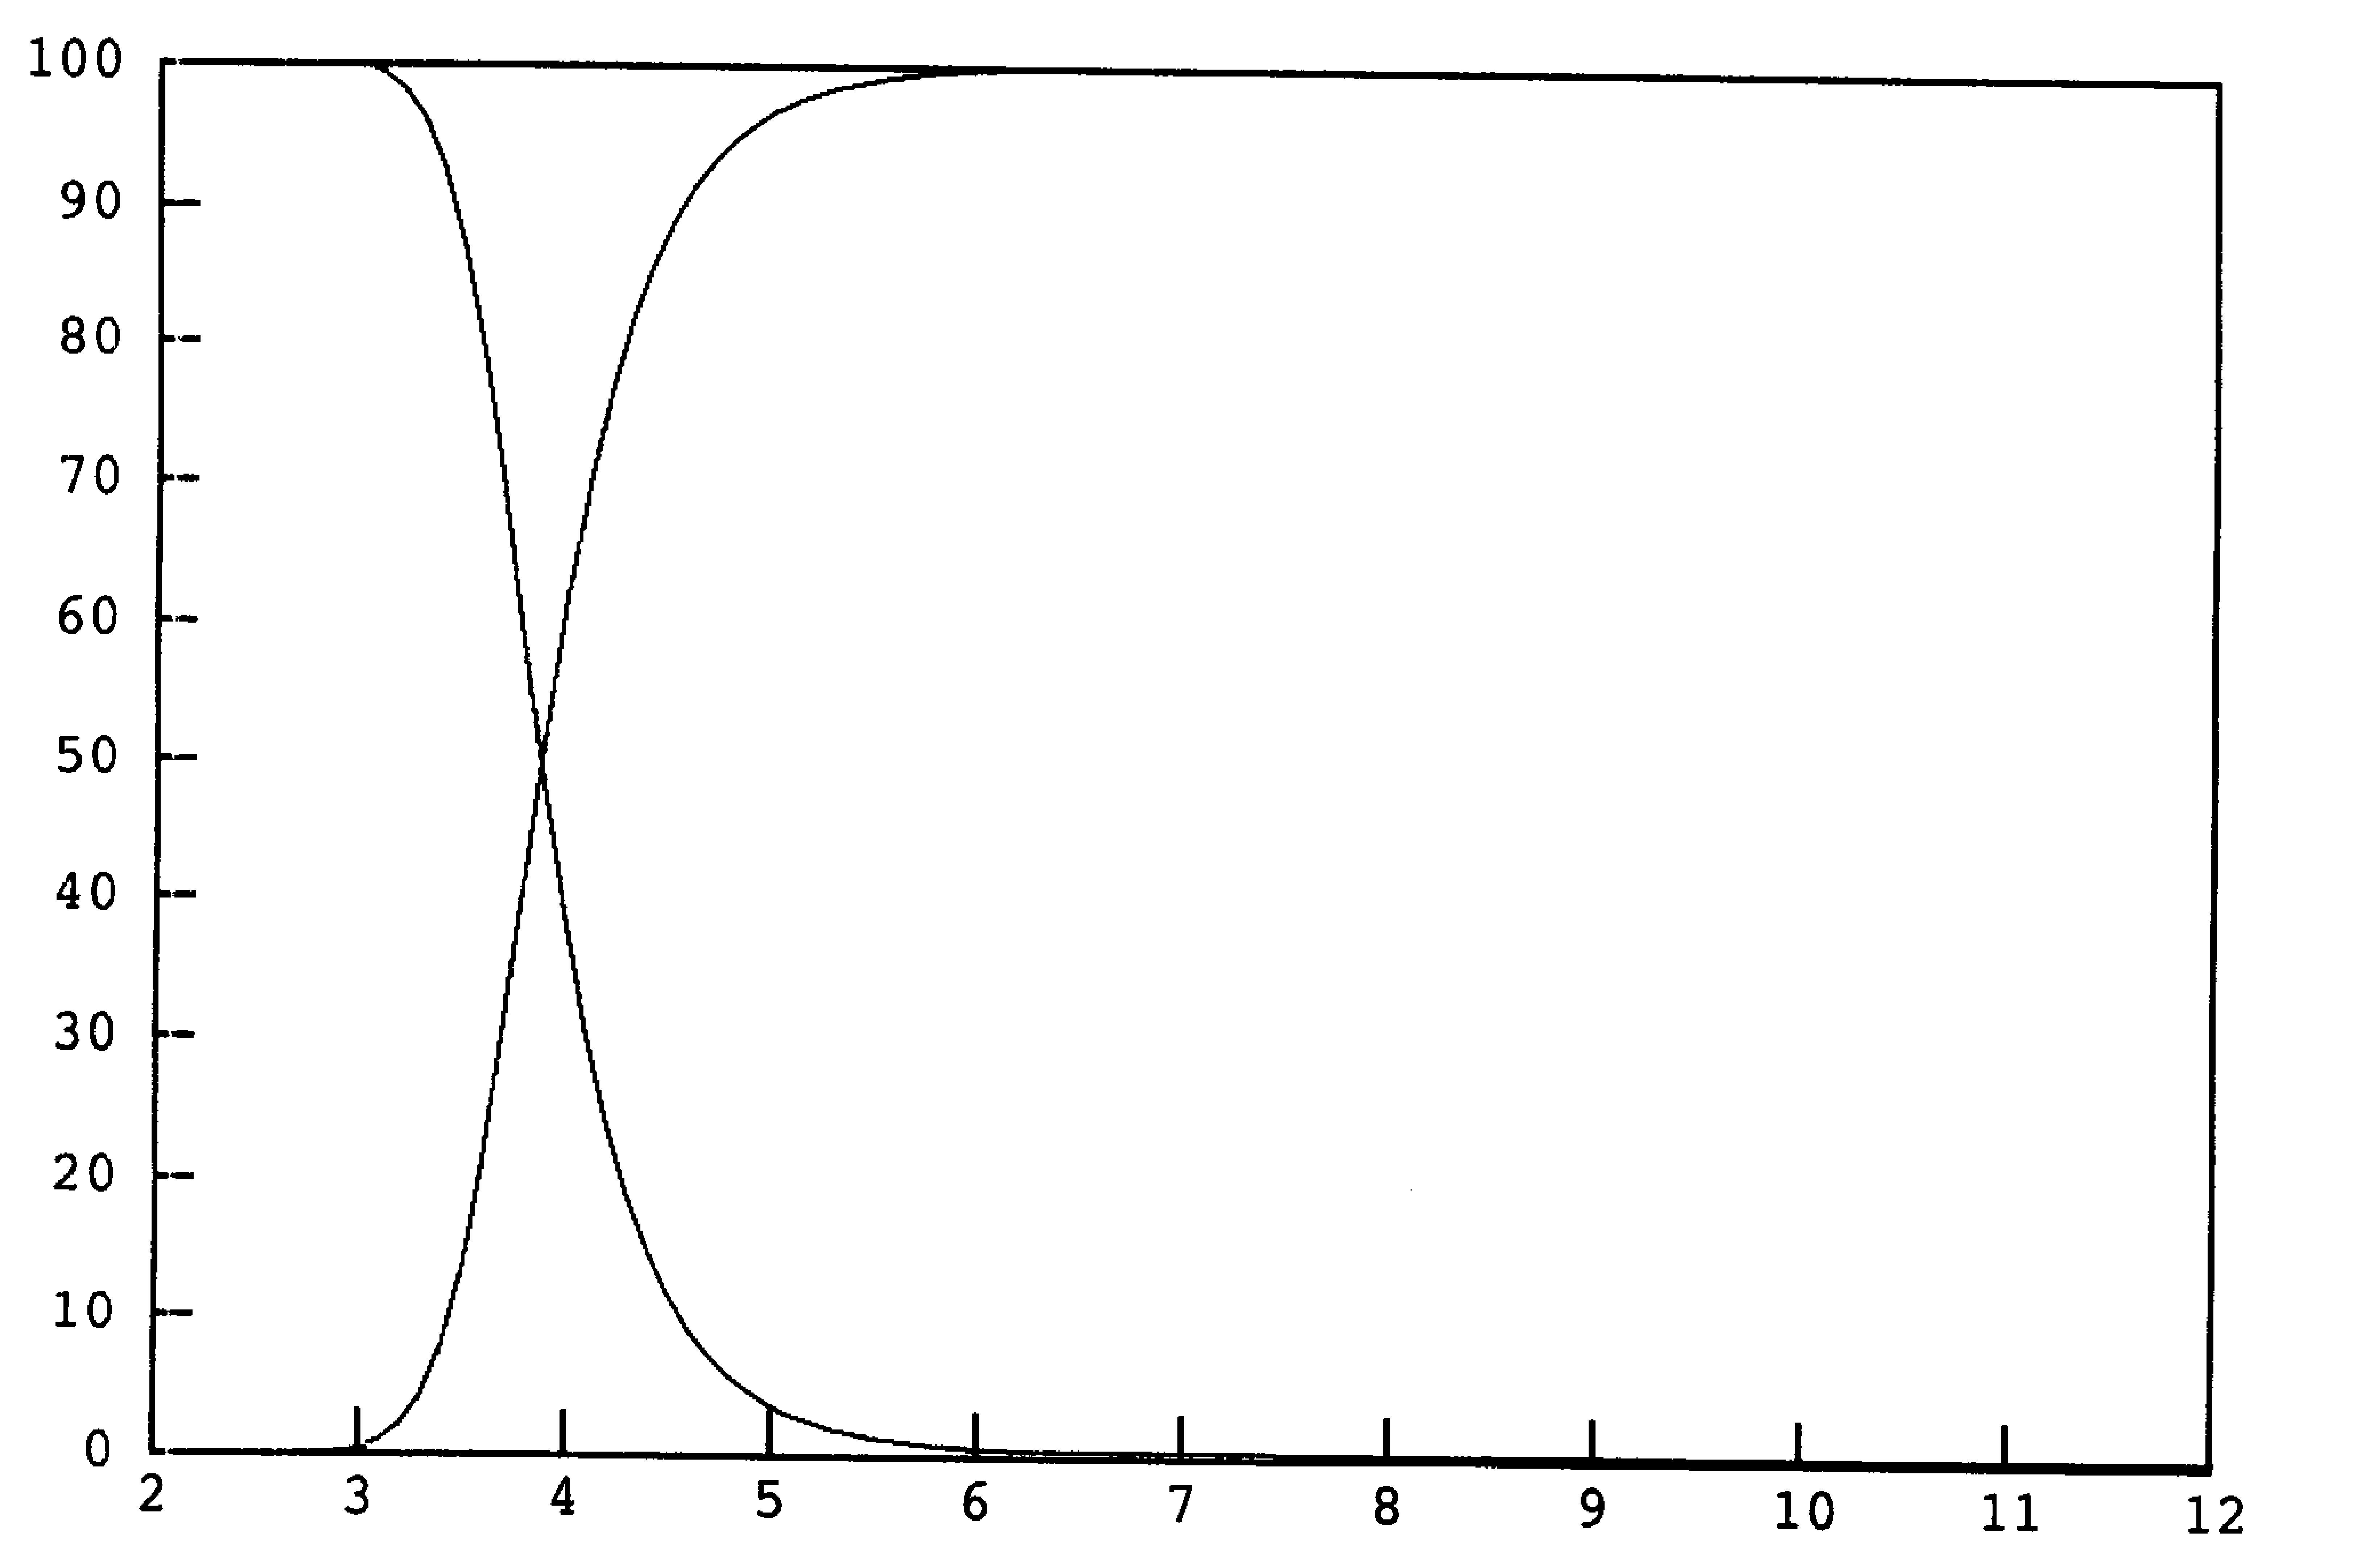


[Gd3+]

[Gd(TTDA-H2P)]

%

pH

**Fig. 11S** Species distribution curves for 1.0  103 mol dm-3 [Gd(TTDA-H2P)] system containing a 1:1 molar ratio of Gd(III) to ligand. T = 25.0  0.1 C; = 0.10 mol dm-3 Me4NNO3 ;  = percent relative to 1.0  10-3 mol dm-3 total TTDA-H2P species = 100 

ln(1/*T*2e)

*T* (K)

**Fig. 12S** Temperature dependence of transverse electronic rates at X-band (0.34 T) and pH 7 for 50 mmol dm-3 solution of [Gd(TTDA)]2(●), [Gd(TTDA-PY)] (○), [Gd(TTDA-HP)] (▼), [Gd(TTDA-H1P)] (open triangle) and [Gd(TTDA-H2P)] (■). The lines represent the simultaneous least-squares fit to all data points as described in the text.
