# Supplementary figures and images for: Synthesis of four derivatives of 3,6,10-tri(carboxymethyl)-3,6,10-triazadodecanedioic acid, the stabilities of their complexes with Ca(ii), Cu(ii), Zn(ii) and lanthanide(iii) and water-exchange investigations of Gd(iii) chelatesElectronic supplementary information (ESI) available: tables of pM values and relaxivities; potentiometric titration curves for TTDA-PY, TTDA-HP, TTDA-H1P and TTDA-H2P; species distribution curves, plots of temperature dependence of transverse electronic relaxation rates and plots of pH dependence of conditional stability constants for Gd complexes of all four ligands and TTDA; 1H NMR and COSY spectra of [La(TTDA-HP)]â€“. See http://www.rsc.org/suppdata/dt/b1/b107456n/
Source: Royal Society of Chemistry journal article supplement (doi:10.1039/b107456n), 2001-10-26

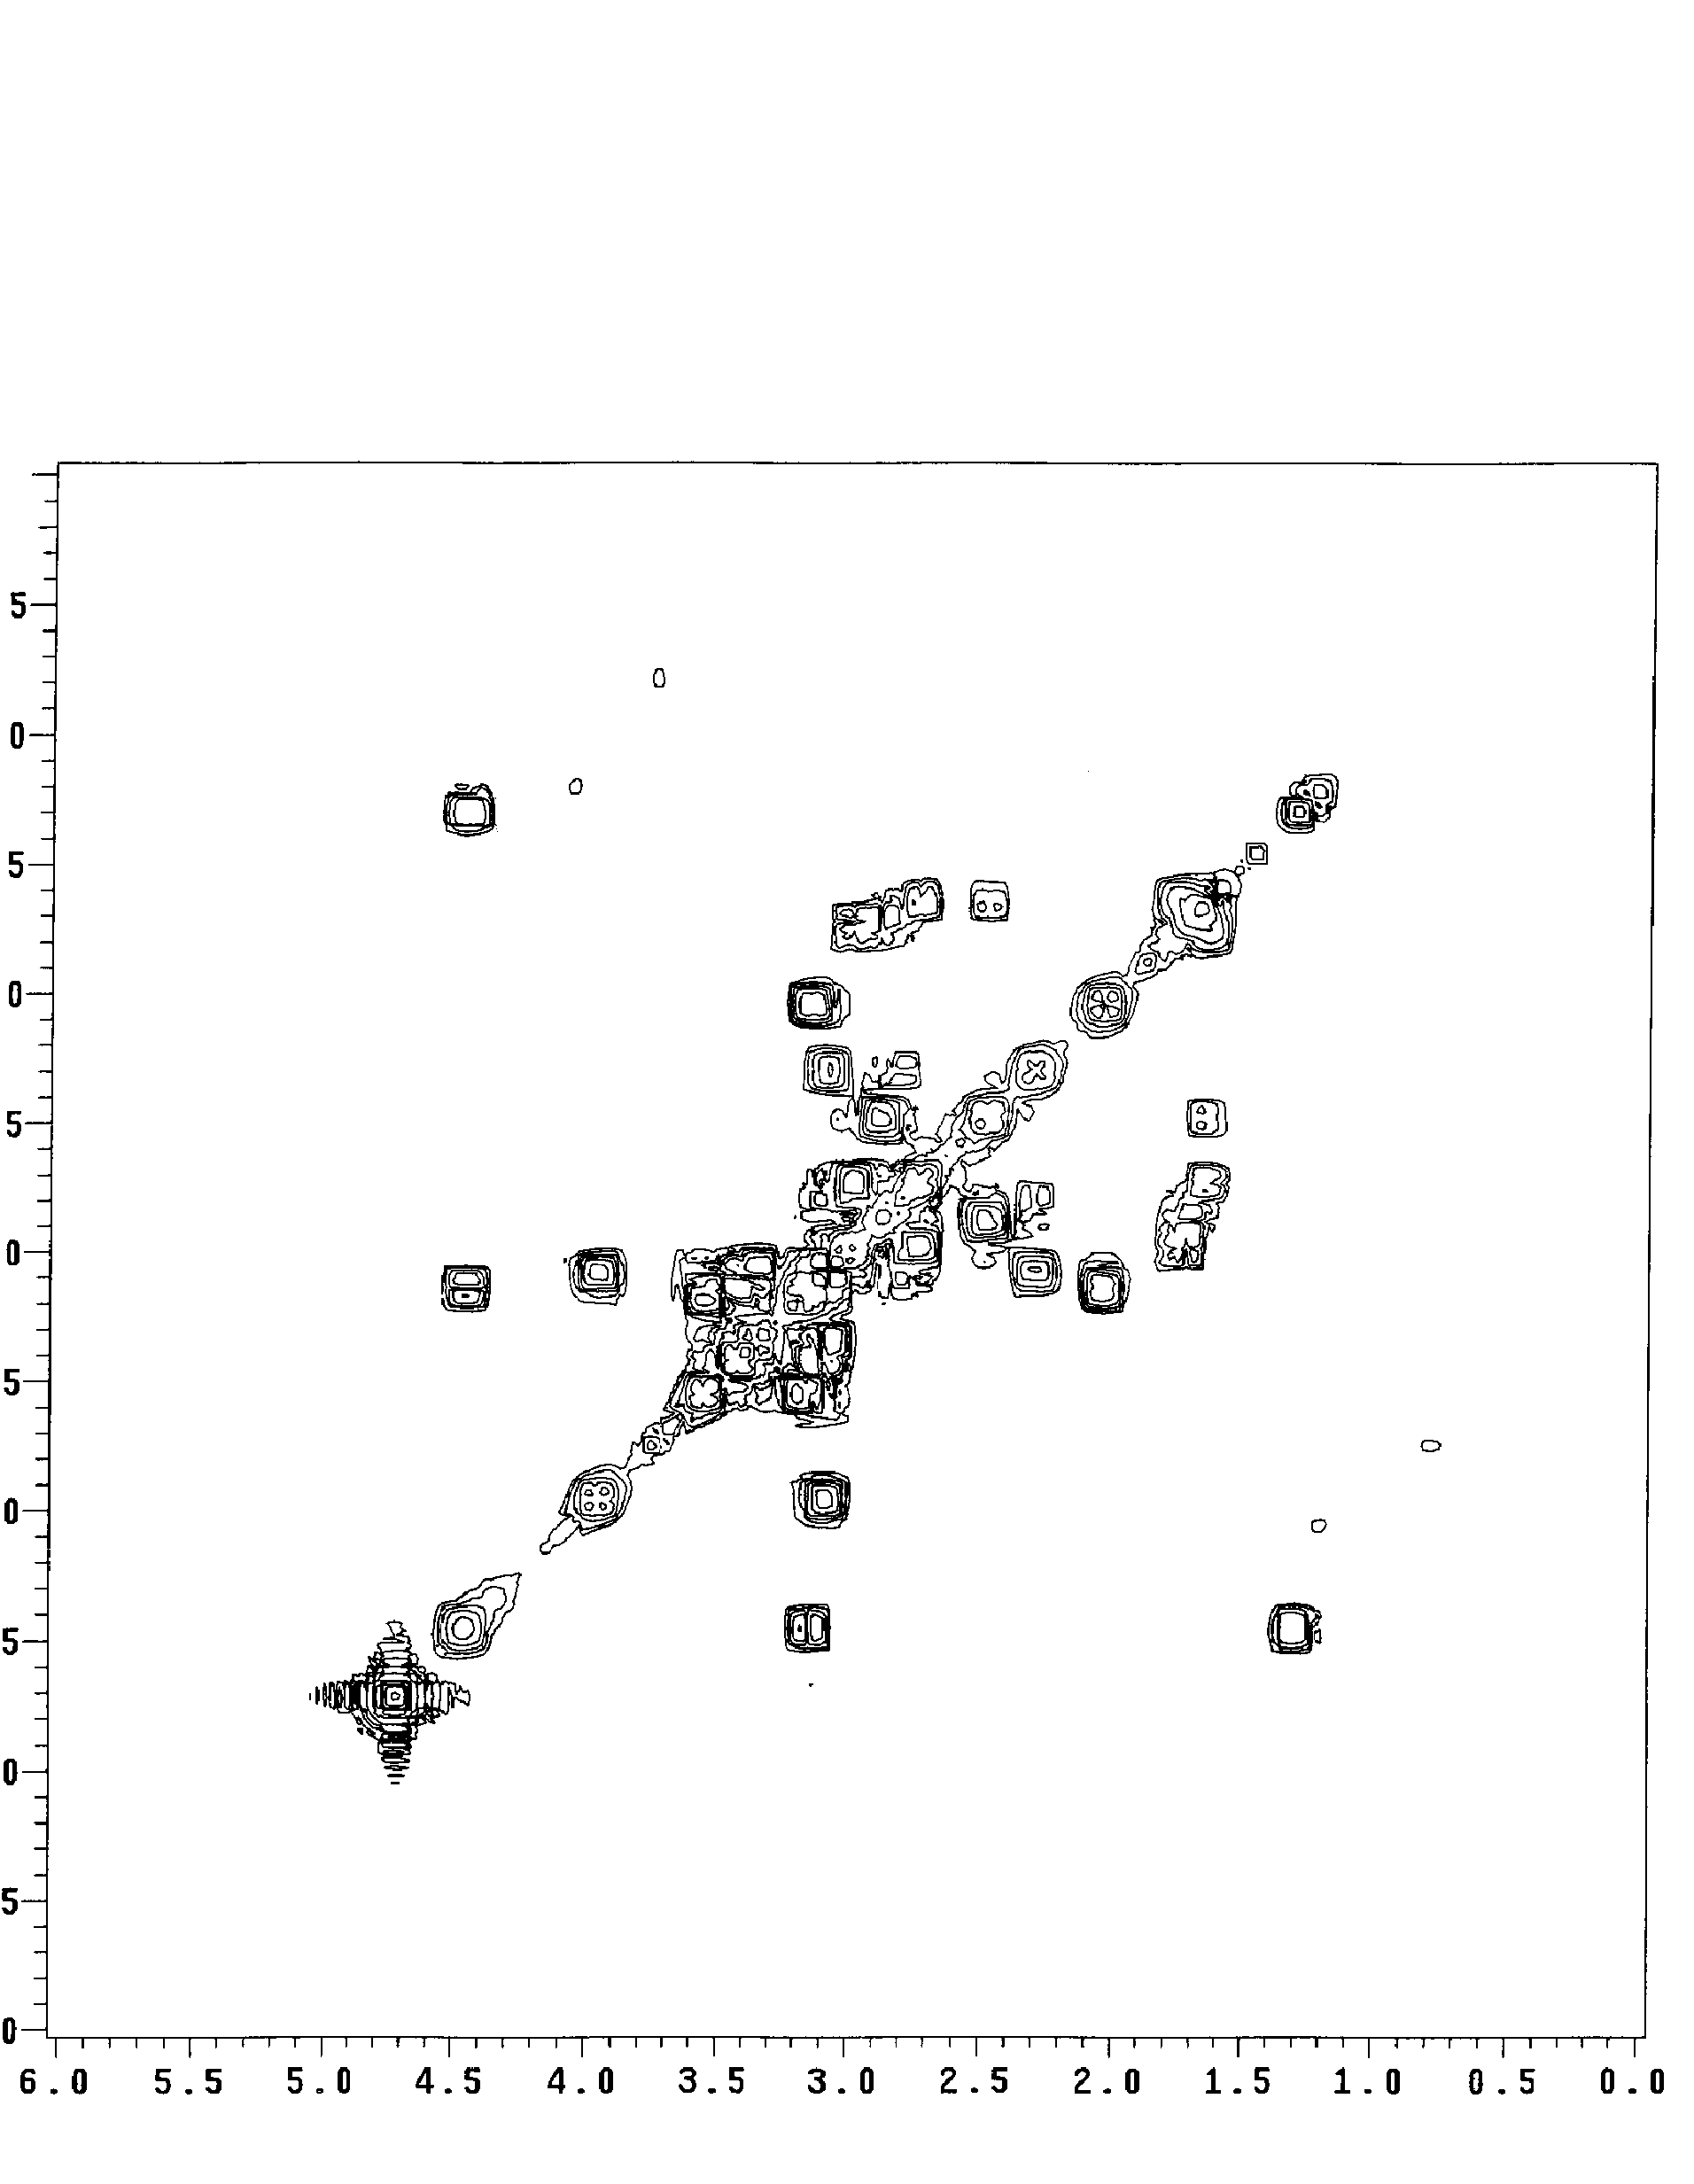


δ (ppm)

δ (ppm)

**Fig. 6S** The COSY spectrum of [La(TTDA-HP)]at 25 C

Supplement: b107456n-3b.doc [file b107456n-3b.doc]

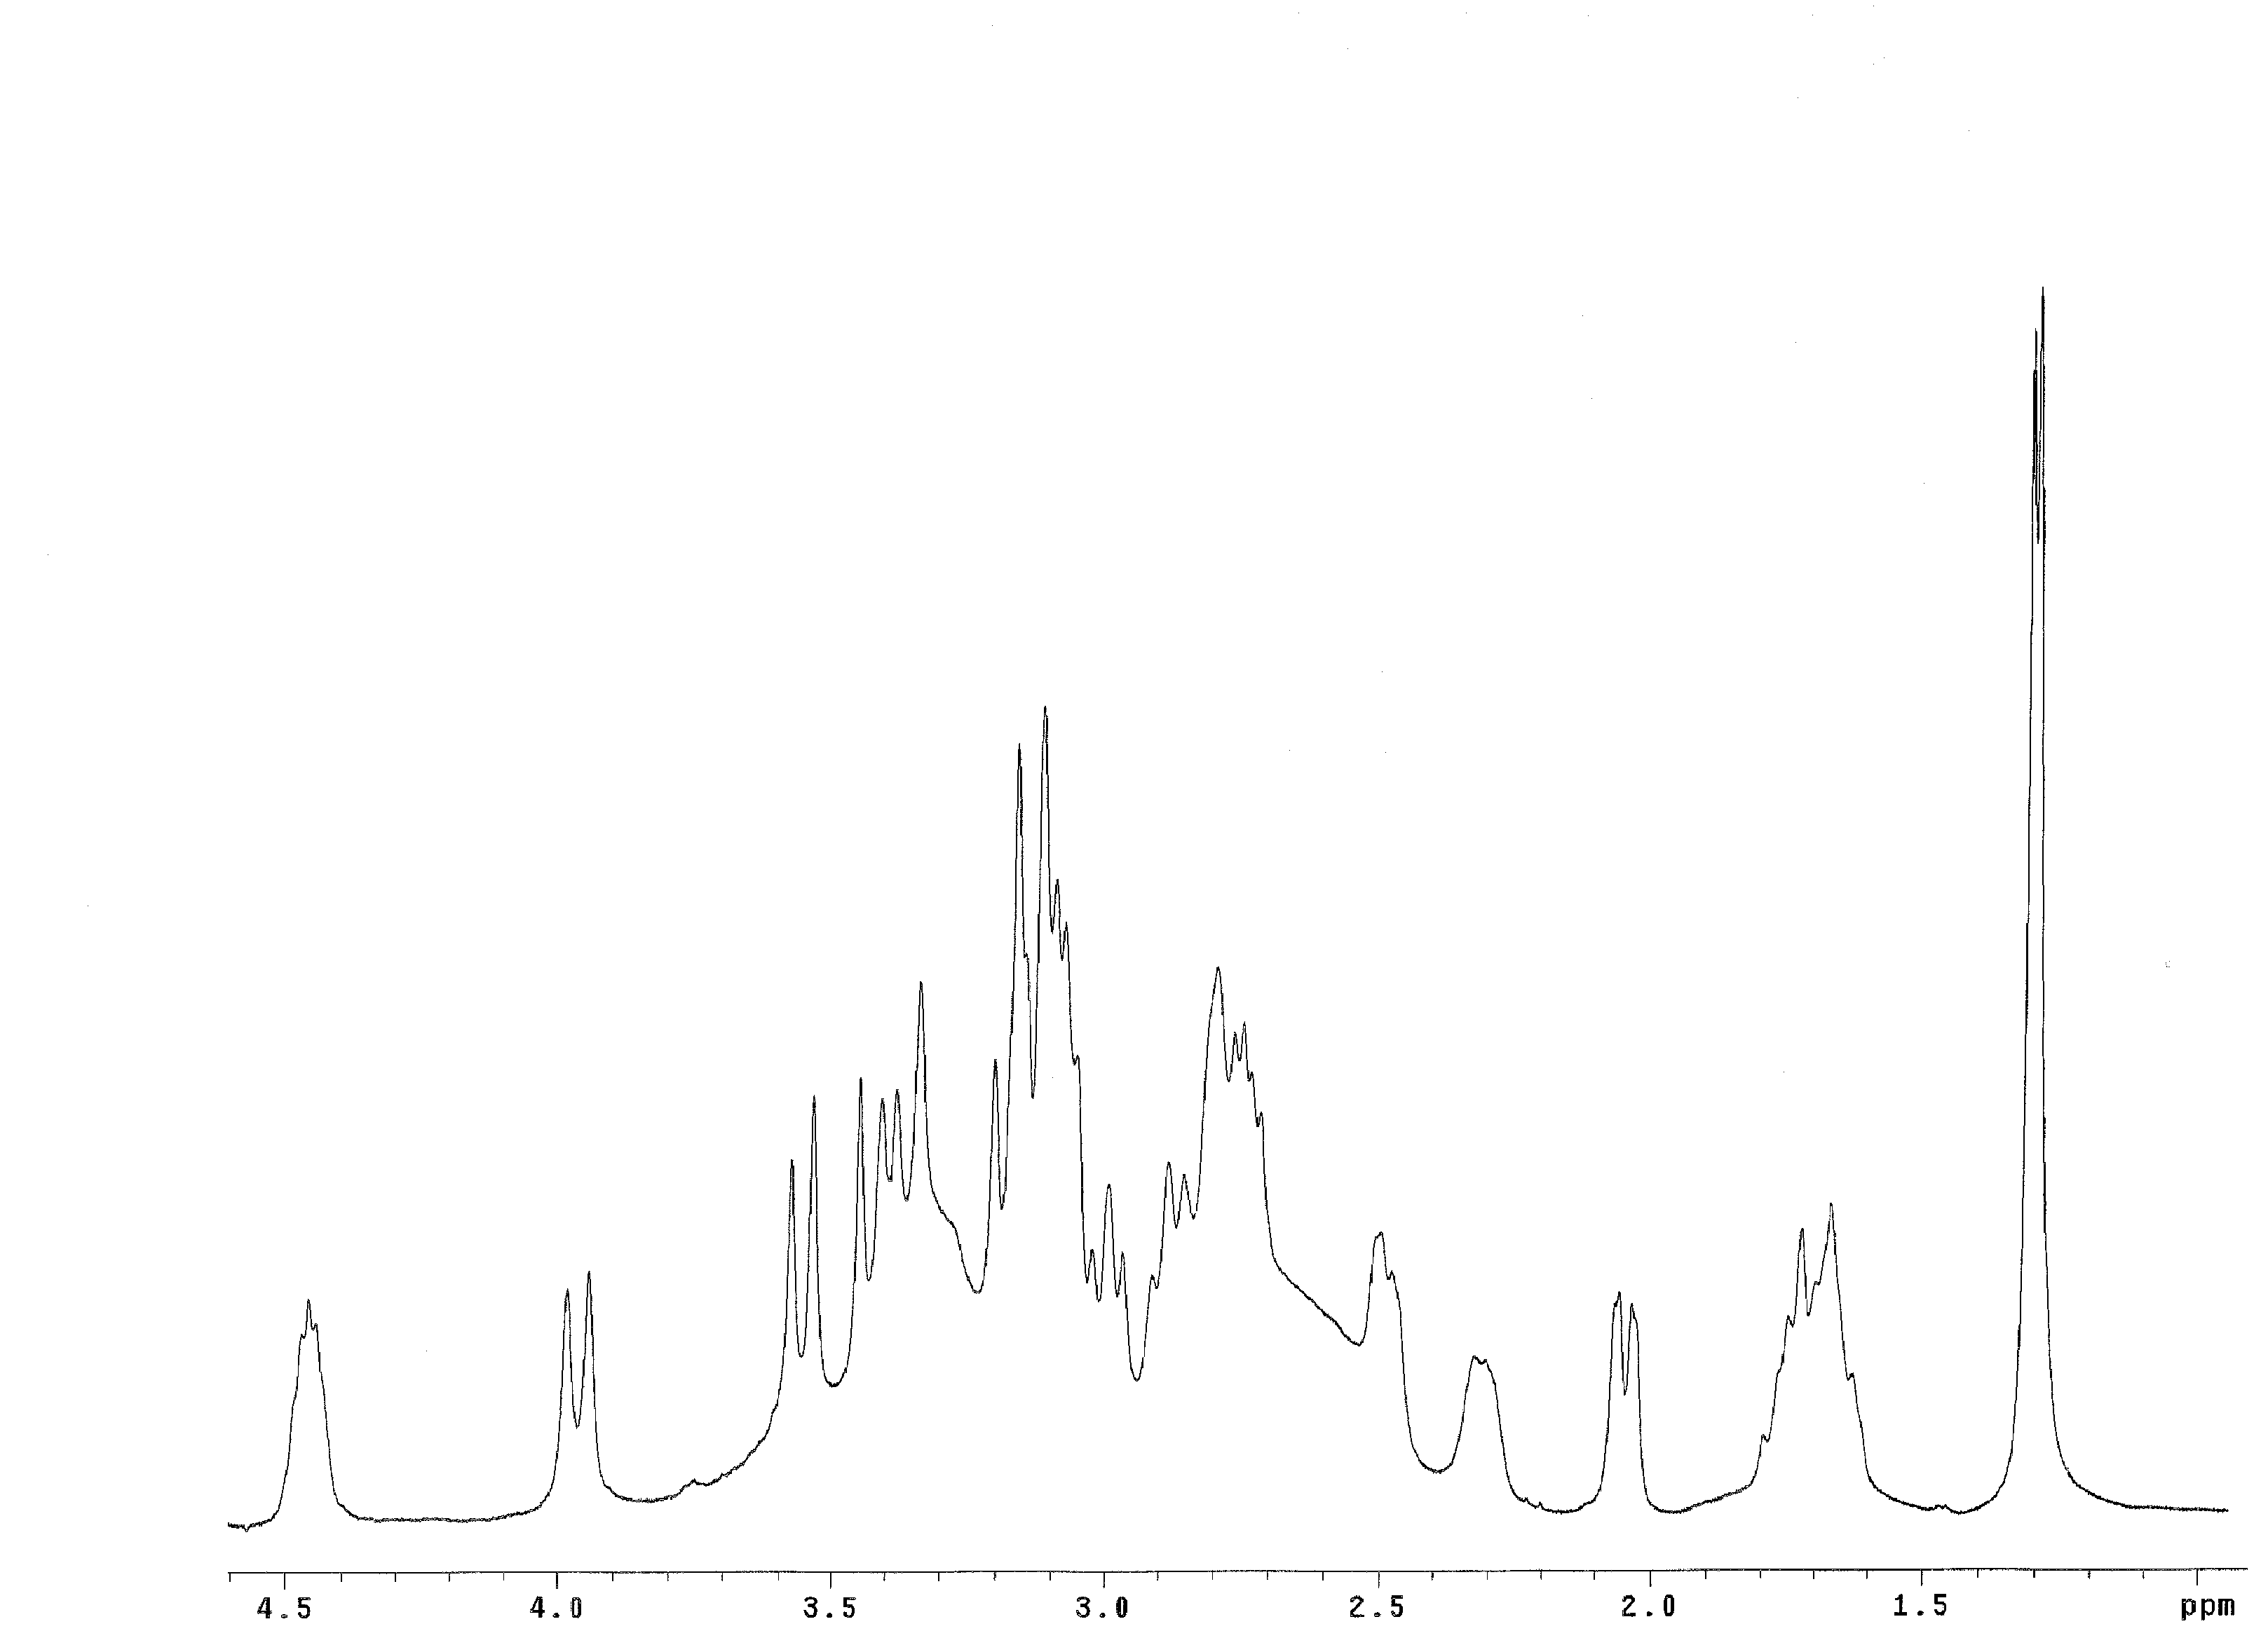


b

c

a

a

a

a

**Fig. 5S** 1H-NMR spectrum of [La(TTDA-HP)]at 25 C

Supplement: b107456n-3.doc [file b107456n-3.doc]
